# Supplementary material for: Evaluation and improvement of the emergency capacity of medical staff for COVID-19: A cross-sectional study in China
Source: Research Square preprint supplement (doi:10.21203/rs.3.rs-56429/v2), 2021-01-19
Supplement: Supplementary file 1 [file 81b42737e99efd06705212af.docx]

**The Emergency Preparedness Information Questionnaire (EPIQ) For COVID-19**

| No. | Item | Familiarity with the content listed (1: very unfamiliar/unskilled. 7: very familiar/skillful) | | | | | | |
| --- | --- | --- | --- | --- | --- | --- | --- | --- |
| **K1: Prevention capabilities** | | | | | | | | |
| K1-1 | Grasp the infection spectrum of the COVID-19 (the concept and significance of the incubation period, infectious period, recessive infection, dominant infection, etc.) | 1 | 2 | 3 | 4 | 5 | 6 | 7 |
| K1-2 | Master the spread of the COVID-19 | 1 | 2 | 3 | 4 | 5 | 6 | 7 |
| K1-3 | Master the prevention and control principles of the COVID-19 | 1 | 2 | 3 | 4 | 5 | 6 | 7 |
| **K2:** **Preparation capabilities** | | | | | | | | |
| K2-1 | Familiar with the duties of medical staff in the "National Emergency Plan for Public Health Emergencies" | 1 | 2 | 3 | 4 | 5 | 6 | 7 |
| K2-2 | Familiar with the responsibilities of medical staff in the "National Emergency Plan for Medical and Health Rescue in Public Emergencies" | 1 | 2 | 3 | 4 | 5 | 6 | 7 |
| K2-3 | Understand the "Regulations on Public Health Emergencies" | 1 | 2 | 3 | 4 | 5 | 6 | 7 |
| K2-4 | Understand the "Law of the People's Republic of China on the Prevention and Control of Infectious Diseases" | 1 | 2 | 3 | 4 | 5 | 6 | 7 |
| K2-5 | Participate regularly in emergency drills for COVID-19 emergencies | 1 | 2 | 3 | 4 | 5 | 6 | 7 |
| K2-6 | Regularly participate in common infectious diseases and emerging infectious diseases training | 1 | 2 | 3 | 4 | 5 | 6 | 7 |
| **K3:** **Coping capabilities were** | | | | | | | | |
| K3-1 | Understand the significance of symptom monitoring | 1 | 2 | 3 | 4 | 5 | 6 | 7 |
| K3-2 | Memorize the definition of syndrome and target disease | 1 | 2 | 3 | 4 | 5 | 6 | 7 |
| K3-3 | Surveillance of COVID-19 cases in emergency situations: Classification of patients according to established case definitions | 1 | 2 | 3 | 4 | 5 | 6 | 7 |
| K3-4 | Remember the time limit for reporting the statutory COVID-19 | 1 | 2 | 3 | 4 | 5 | 6 | 7 |
| K3-5 | Fill in the "Report Card of Infectious Diseases of the People's Republic of China" correctly | 1 | 2 | 3 | 4 | 5 | 6 | 7 |
| K3-6 | Keep in mind the scope of information report related to the COVID-19 emergency | 1 | 2 | 3 | 4 | 5 | 6 | 7 |
| K3-7 | Understand the reporting process of COVID-19 emergency | 1 | 2 | 3 | 4 | 5 | 6 | 7 |
| K3-8 | Master the basic knowledge of medical response to COVID-19 emergencies | 1 | 2 | 3 | 4 | 5 | 6 | 7 |
| K3-9 | Properly implement specimen collection for patients with COVID-19 | 1 | 2 | 3 | 4 | 5 | 6 | 7 |
| K3-10 | Understand the precautions for specimen preservation and transportation | 1 | 2 | 3 | 4 | 5 | 6 | 7 |
| K3-11 | Know the reliable source of information | 1 | 2 | 3 | 4 | 5 | 6 | 7 |
| K3-12 | Obtain key information from selected information sources | 1 | 2 | 3 | 4 | 5 | 6 | 7 |
| K3-13 | Master the methods of self-adjustment under the COVID-19 situation | 1 | 2 | 3 | 4 | 5 | 6 | 7 |
| K3-14 | Remember the meaning of standard prevention | 1 | 2 | 3 | 4 | 5 | 6 | 7 |
| K3-15 | Keep in mind the protection requirements for various transmission routes of the SARS-CoV-2- | 1 | 2 | 3 | 4 | 5 | 6 | 7 |
| K3-16 | Correctly put on and take off personal protective equipment | 1 | 2 | 3 | 4 | 5 | 6 | 7 |
| K3-17 | Master emergency treatment methods exposed to patients' blood and body fluids | 1 | 2 | 3 | 4 | 5 | 6 | 7 |
| K3-18 | Master the principles of setting up infection wards | 1 | 2 | 3 | 4 | 5 | 6 | 7 |
| K3-19 | Properly implement hand hygiene | 1 | 2 | 3 | 4 | 5 | 6 | 7 |
| K3-20 | Dispose of medical waste properly | 1 | 2 | 3 | 4 | 5 | 6 | 7 |
| K3-21 | Correctly dispose of the corpses of patients with COVID-19 or suspected patients | 1 | 2 | 3 | 4 | 5 | 6 | 7 |
| K3-22 | Master the method of environmental disinfection | 1 | 2 | 3 | 4 | 5 | 6 | 7 |
| K3-23 | Master the quarantine principles for various transmission routes of the SARS-CoV-2 | 1 | 2 | 3 | 4 | 5 | 6 | 7 |
| K3-24 | Correctly isolate patients with COVID-19 | 1 | 2 | 3 | 4 | 5 | 6 | 7 |
| K3-25 | Master the quarantine methods for all kinds of close contacts of COVID-19 | 1 | 2 | 3 | 4 | 5 | 6 | 7 |
| K3-26 | Formulate a health education program to control the spread of COVID-19 | 1 | 2 | 3 | 4 | 5 | 6 | 7 |
| K3-27 | Understand the response to public health emergencies of COVID-19 | 1 | 2 | 3 | 4 | 5 | 6 | 7 |
| K3-28 | Know the precautions for participating in international rescue | 1 | 2 | 3 | 4 | 5 | 6 | 7 |
